# Supplementary material for: Synthesis of hollow ZnSe nanospheres with high photocatalytic activity: synergetic effect of cation exchange and selective Cu2−xSe template etching
Source: Royal Society of Chemistry journal article supplement (doi:10.1039/c8ce00649k), 2018-01-01
Supplement: c8ce00649k1.pdf [file c8ce00649k1.pdf]

## Supporting Information

### **Synthesis of hollow ZnSe nanospheres with high photocatalytic activity: synergetic effect of cation exchange and selective $\text{Cu}_{2-x}\text{Se}$ template etching**

Xin Huang,<sup>a,b</sup> Yu Zou,<sup>\*b,c</sup> Jian Hao<sup>a,d</sup> and Jiang Jiang<sup>\*b</sup>

<sup>a</sup> Department of Chemistry, Shanghai University, Shanghai 200444, China.

<sup>b</sup> *i*-Lab and Division of Nanobiomedicine, CAS Key Laboratory of Nano-Bio Interface, CAS Center for Excellence in Nanoscience, Suzhou Institute of Nano-Tech and Nano-Bionics, Chinese Academy of Sciences, Suzhou 215123, China.

E-mail: yzou2012@sinano.ac.cn; jjiang2010@sinano.ac.cn

<sup>c</sup> State Key Lab of Silicon Materials, Zhejiang University, Hangzhou 310027, China

<sup>d</sup> Fundamental Science Institute of Cultural Heritage Conservation, Shanghai University, Shanghai 200444, China.

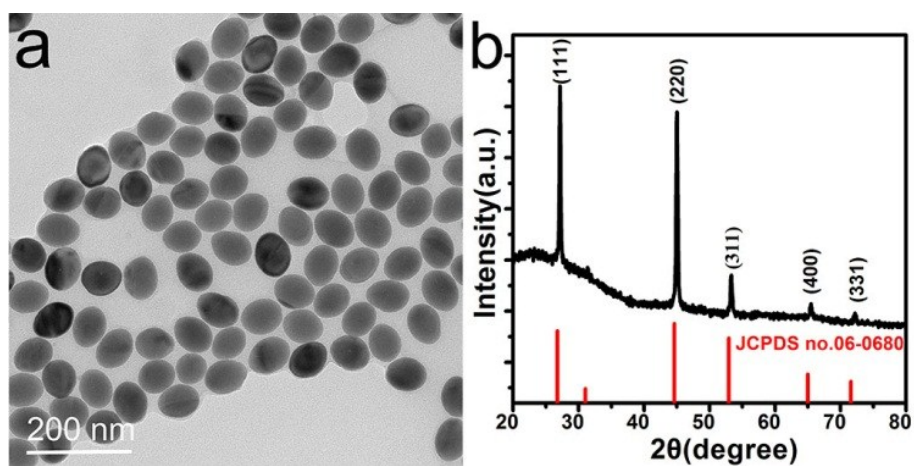

**Fig. S1** TEM image (a) and XRD pattern (b) of the template  $\text{Cu}_{2-x}\text{Se}$  nanoparticles.

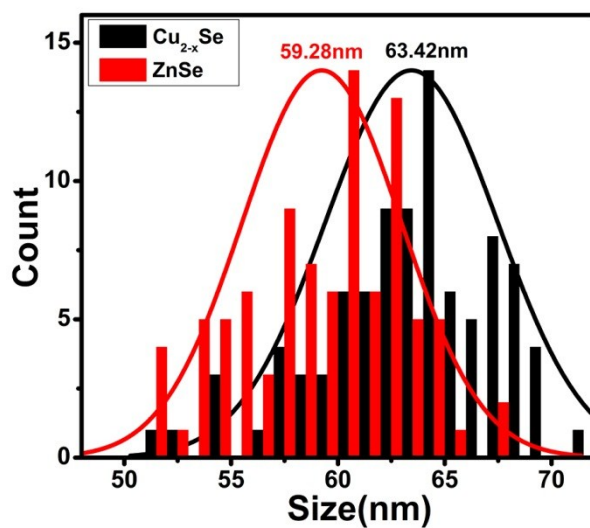

**Fig. S2** Size comparison between hollow ZnSe nanospheres and original  $\text{Cu}_{2-x}\text{Se}$  templates.

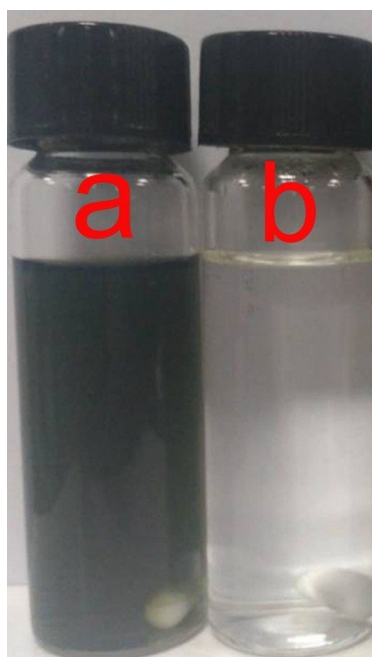

**Fig. S3** The photograph of  $\text{Cu}_{2-x}\text{Se}$  methanol dispersion before (a) and after (b) addition of TBP in air.

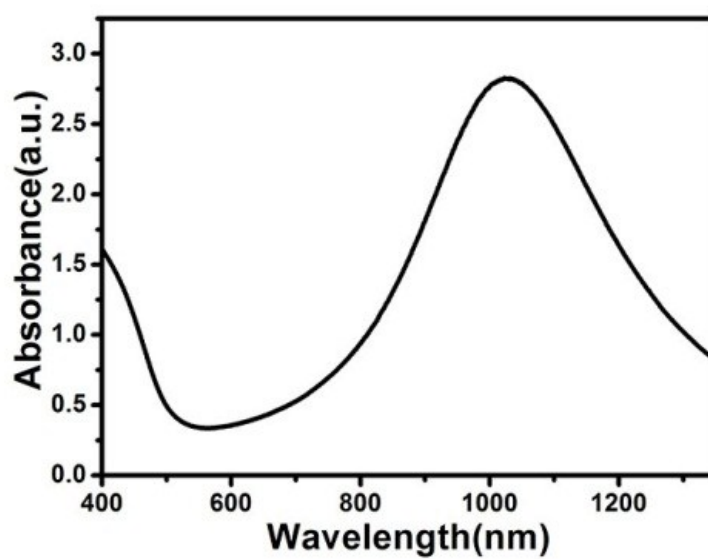

**Fig. S4.** The UV-vis-NIR absorption spectrum of  $\text{Cu}_{2-x}\text{Se}$  nanospheres.

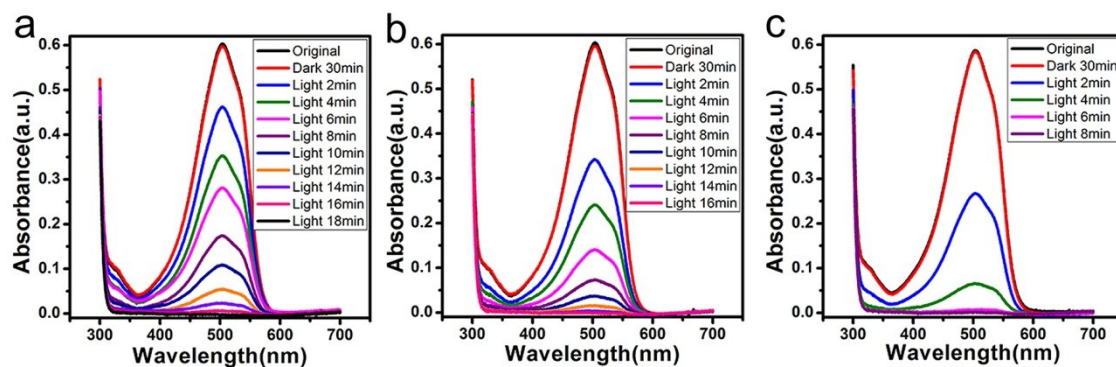

**Fig. S5** The time-dependent absorption spectra of MO solution containing P25 (a), bulk ZnSe (b) and hollow ZnSe (c) of the same weight under light irradiation produced by a 300 W Xe lamp with wavelength coverage from 320 nm to 780 nm.

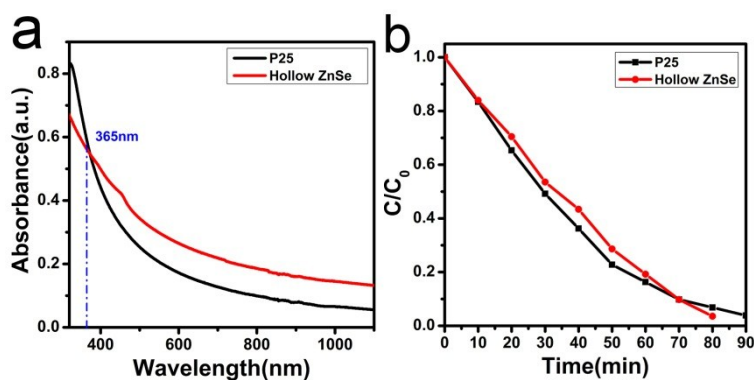

**Fig. S6** (a) Absorption spectra of ZnSe hollow nanospheres and  $\text{TiO}_2$  aqueous dispersion with the same optical density at 365 nm; (b) Comparison of photocatalytic degradation kinetics of methyl orange solution under 365 nm UV lamp excitation in presence of ZnSe hollow nanospheres and  $\text{TiO}_2$  with same optical density at 365 nm.

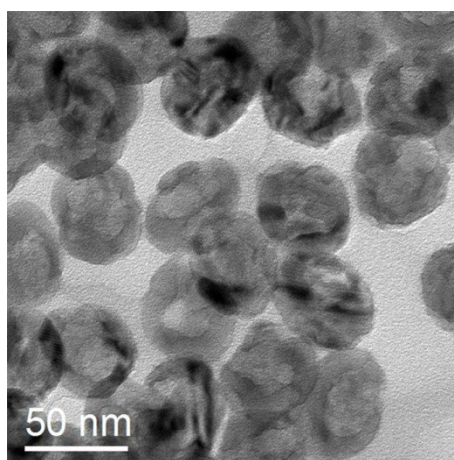

**Fig. S7** TEM image of the hollow ZnSe nanospheres after photocatalytic degradation of MO.
